# Supplementary material for: An Automated Solid-Phase Extraction–UPLC–MS/MS Method for Simultaneous Determination of Sulfonamide Antimicrobials in Environmental Water
Source: MDPI journal article supplement (doi:10.3390/molecules28124694), 2023-06-11
Supplement: s1 [file s1]

## **SUPPORTING INFORMATION**

### **Automated solid-phase extraction: A simple and robust method for the analysis of sulfonamide antimicrobials in environmental water samples**

Mengyu Qi<sup>1,2</sup>, Pengfei He<sup>2</sup>, Hongmei Hu<sup>2,3,\*</sup>, Tongtong Zhang<sup>1,2</sup>, Tiejun Li<sup>2,\*</sup>, Xiaoning Zhang<sup>4</sup>, Yilin Qin<sup>1</sup>, Yingjie Zhu<sup>1,2</sup>, Yuanming Guo<sup>2</sup>

<sup>1</sup> Institute of Marine and Fisheries, Zhejiang Ocean University, Zhoushan 316021, China.

<sup>2</sup> Key Laboratory of Sustainable Utilization of Technology Research for Fisheries Resources of Zhejiang Province, Zhejiang Marine Fisheries Research Institute, Zhoushan 316021, China.

<sup>3</sup> Department of Chemistry, Zhejiang University, Hangzhou 310007, China

<sup>4</sup> State Key Laboratory of Resource Insects, College of Sericulture, Textile and Biomass Sciences, Southwest University, Chongqing 400715, China.

Corresponding Author

Hongmei Hu

E-mail: huhm@zju.edu.cn

Tiejun Li

E-mail: litiejun1982@126.com

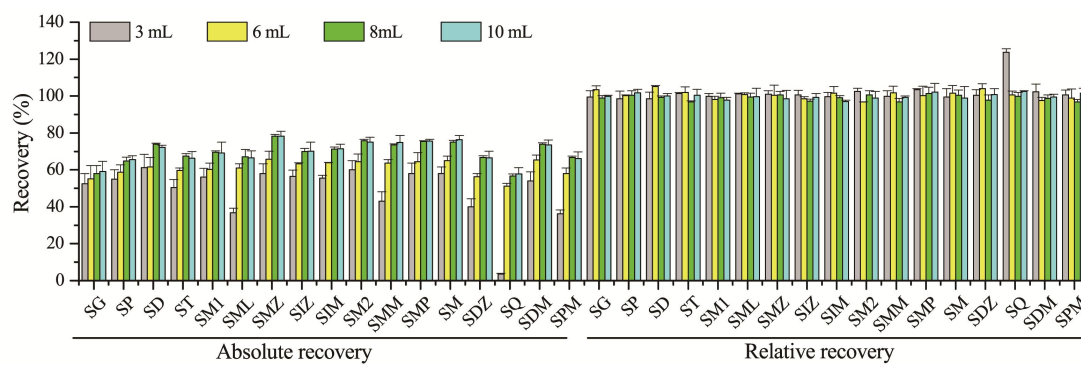

**Figure S1. Effect of eluent volume on extraction efficiency: 1.0 L of ultrapure water spiked with 20 ng/L SAs, pH 7.0 (n=3).**

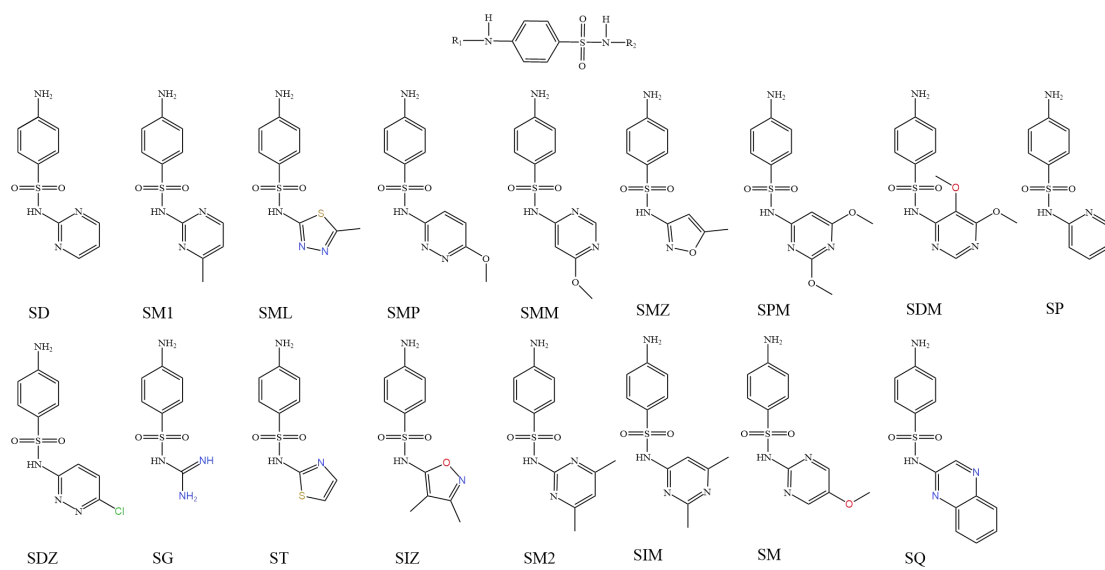

**Figure S2. Chemical structures of the 17 SAs.**

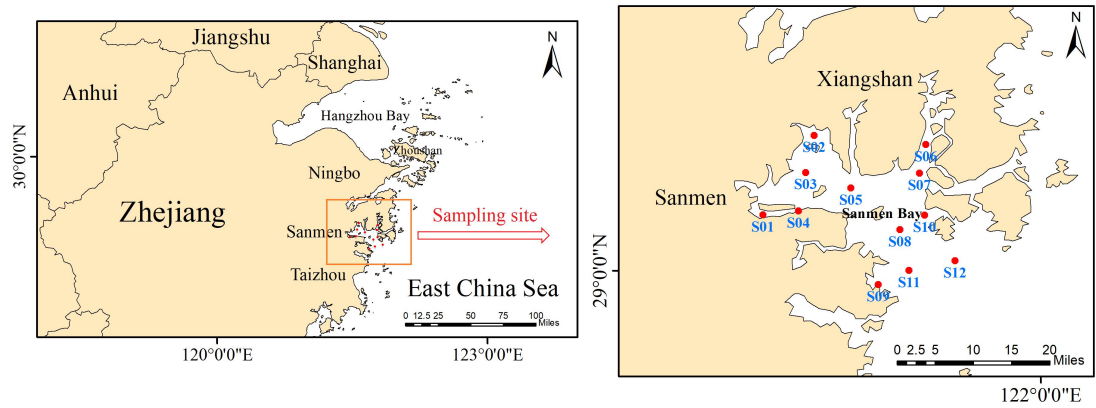

**Figure S3.** Map of sampling sites in Sanmen Bay, East China Sea.

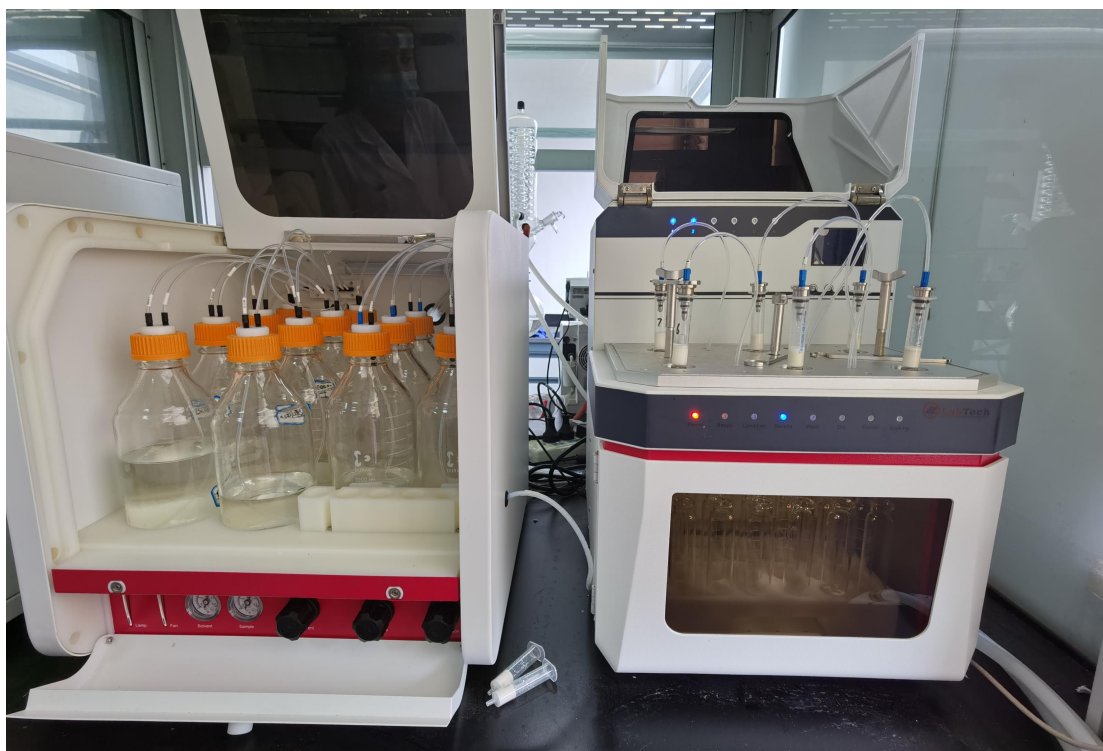

**Figure S4. Automatic cartridge-disk universal solid phase extraction system (LabTech, China).**

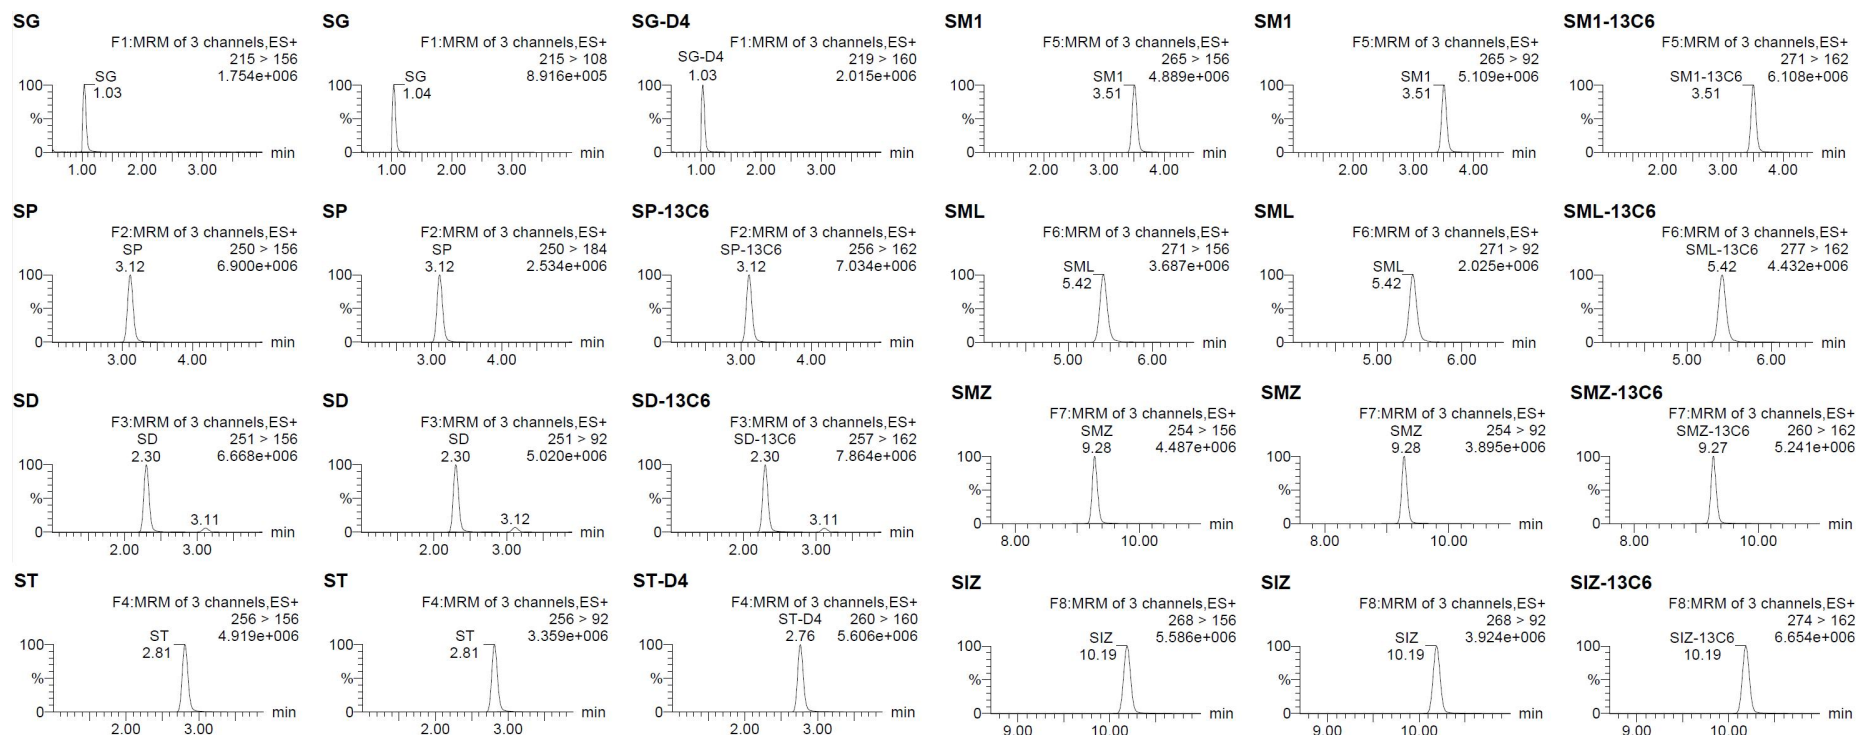

**Figure S5-1. UPLC–MS/MS chromatograms of SAs standard at 20 µg/L.**

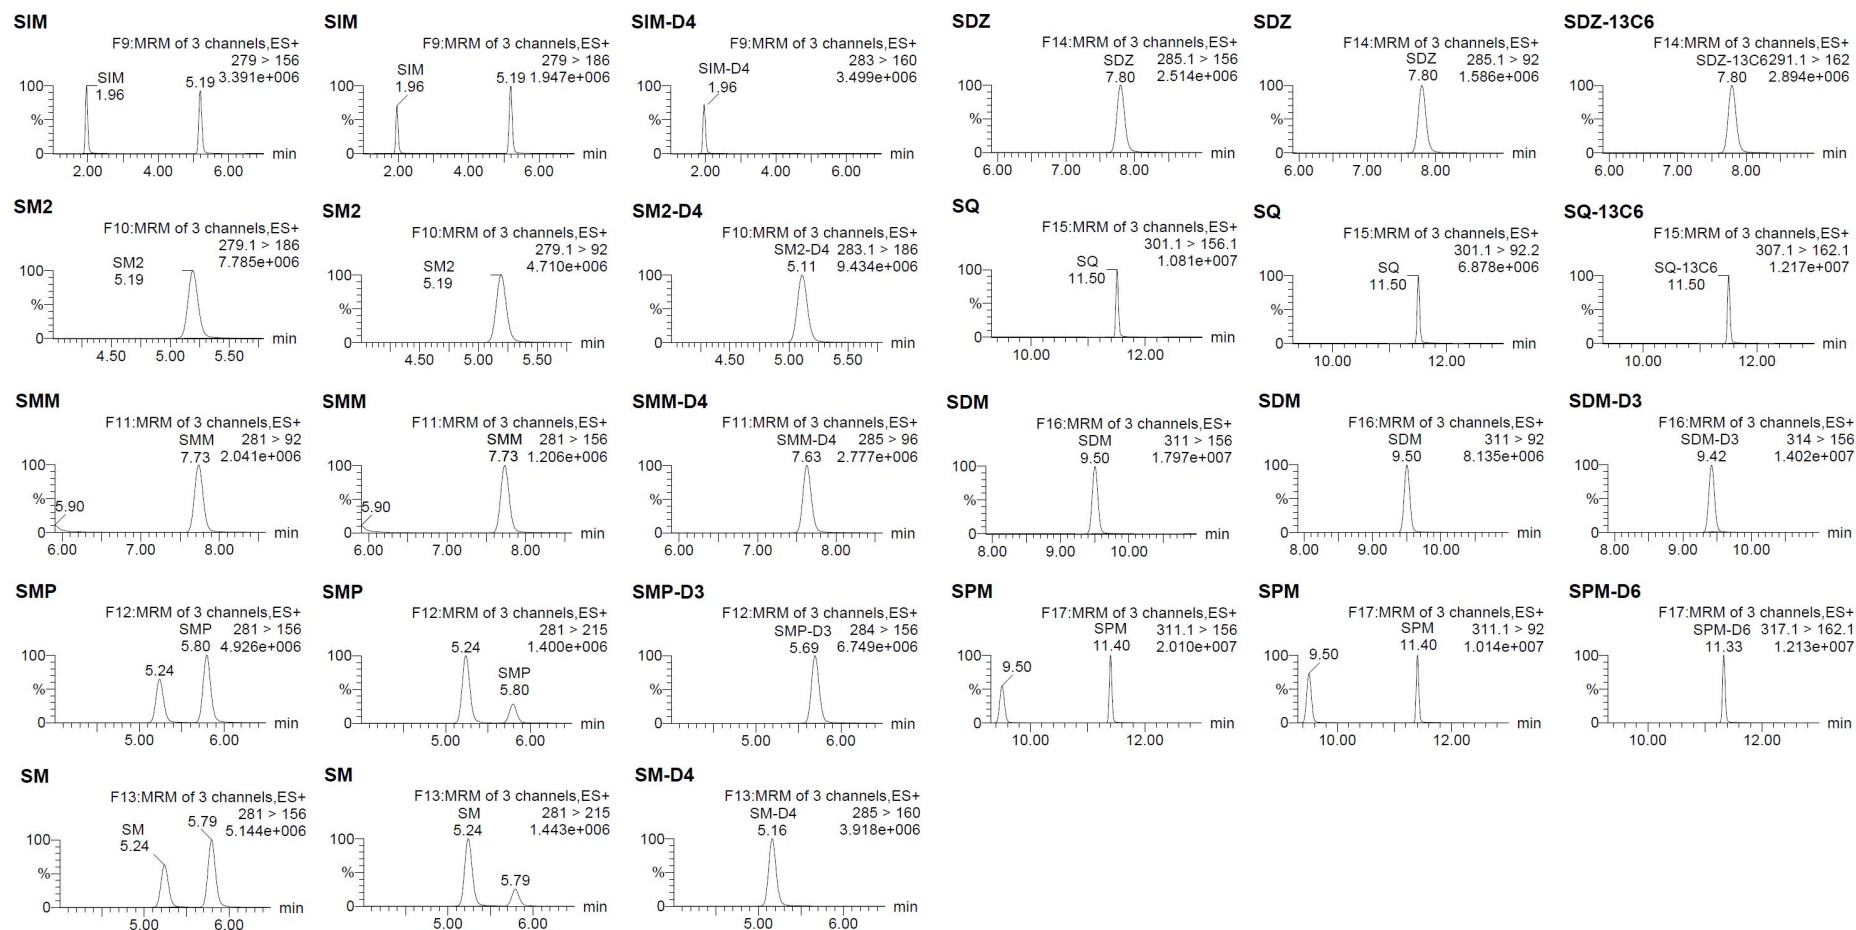

**Figure S5-2. UPLC–MS/MS chromatograms of SAs standard at 20 µg/L.**

**Table S1. Recoveries of real water samples spiked with SAs obtained by applying the proposed automated SPE UPLC-MS/MS method.**

| Analyte | Pure water (n=5) |      | Tap water (n=5) |     | River water (n=5) |      | Seawater (n=5)   |     |
|---------|------------------|------|-----------------|-----|-------------------|------|------------------|-----|
|         | Spiked: 1 ng/L   |      | Spiked: 10 ng/L |     | Spiked: 20 ng/L   |      | Spiked: 100 ng/L |     |
|         | Recovery         | RSD  | Recovery        | RSD | Recovery          | RSD  | Recovery         | RSD |
|         | (%)              | (%)  | (%)             | (%) | (%)               | (%)  | (%)              | (%) |
| SG      | 93               | 5.9  | 102             | 2.4 | 90                | 6.9  | 111              | 0.4 |
| SP      | 88               | 4.8  | 117             | 2.9 | 98                | 5.3  | 111              | 0.4 |
| SD      | 105              | 8.6  | 111             | 3.1 | 102               | 10.0 | 112              | 5.1 |
| ST      | 88               | 7.9  | 108             | 3.2 | 102               | 8.1  | 110              | 4.3 |
| SM1     | 101              | 7.0  | 107             | 3.4 | 103               | 10.2 | 117              | 2.0 |
| SML     | 99               | 1.2  | 106             | 1.4 | 101               | 10.7 | 116              | 2.0 |
| SMZ     | 98               | 4.9  | 103             | 3.4 | 101               | 5.6  | 105              | 5.0 |
| SIZ     | 99               | 1.8  | 107             | 3.2 | 100               | 9.8  | 113              | 2.8 |
| SIM     | 86               | 8.8  | 109             | 5.4 | 96                | 5.0  | 104              | 1.0 |
| SM2     | 82               | 5.9  | 109             | 0.9 | 91                | 5.6  | 116              | 2.6 |
| SMM     | 102              | 6.9  | 110             | 2.8 | 103               | 9.2  | 114              | 0.3 |
| SMP     | 88               | 1.6  | 103             | 3.5 | 104               | 8.2  | 118              | 2.2 |
| SM      | 79               | 2.9  | 109             | 7.0 | 101               | 11.4 | 111              | 0.6 |
| SDZ     | 98               | 14.5 | 104             | 4.4 | 100               | 10.0 | 116              | 1.5 |
| SQ      | 102              | 14.2 | 105             | 3.2 | 103               | 8.2  | 105              | 2.4 |
| SDM     | 88               | 10.2 | 101             | 1.6 | 102               | 9.4  | 117              | 0.7 |
| SPM     | 100              | 12.9 | 108             | 2.0 | 97                | 9.1  | 113              | 1.7 |



**Table S2. Comparison of different methods for the analysis of SAs in water.**

| Method                                            | N* | Sample volume | Sample pretreatment                                    | sorbent                                      | Extract solvent      | Elution or disperser solvent                                        | Processing time (min) | LOD (ng/L)  | Recovery (%) | RSD (%) | Ref.         |
|---------------------------------------------------|----|---------------|--------------------------------------------------------|----------------------------------------------|----------------------|---------------------------------------------------------------------|-----------------------|-------------|--------------|---------|--------------|
| manual SPE<br>UPLC-MS/MS                          | 18 | 1 L           | Addition Na <sub>2</sub> EDTA,<br>pH adjustment of 2.0 | 200 mg of Oasis HLB                          | /                    | 10 mL of 2% formic acid solution in methanol/acetonitrile(4:1, v/v) | > 250 min             | 0.014–0.293 | 84.8–108     | <10     | [15]         |
| On-line SPE<br>HPLC-MS/MS                         | 16 | 5 mL          | /                                                      | Oasis HLB                                    | /                    | 1 mL of acetonitrile, 1 mL of Methanol, and 1 mL of HPLC water      | <20 min               | 0.03–3.3    | 39.7–134.4   | <16     | [12]         |
| On-line SPE<br>UPLC-MS/MS                         | 9  | 10 mL         | Addition formic acid                                   | HyperSep Retain PEP <sup>a</sup>             | /                    | methanol/acetonitrile(1:1, v/v)                                     | 20 min                | 1.32–7.91   | 65–169       | <22     | [16]         |
| MIP-SPE HPLC-PDA                                  | 6  | 50 mL         | pH adjustment of 7.0                                   | 20 mg of MIP(pre) <sup>b</sup>               | /                    | 1 mL of methanol                                                    | ~21 min               | 10–14       | 87.4–102.3   | <7      | [10]         |
| DLLME UPLC-DAD                                    | 11 | 5 mL          | Addition NaCl,<br>pH adjustment of 7.6                 | /                                            | 685 µL of chloroform | 1250 µL of acetonitrile                                             | <20 min               | 410–9870    | 78–117       | ≤20     | [21]         |
| MSPE UPLC-MS/MS                                   | 8  | 200 mL        | pH adjustment of 4                                     | 15 mg of CMGO <sup>c</sup>                   | /                    | 2.0 mL of methanol containing 1% (v/v) ammonia                      | ~30 min               | 0.49–1.59   | 82–106.2     | <7.2    | [6]          |
| In situ derivatization<br>and HF LPME<br>UPLC-FLD | 8  | 8 mL          | pH adjustment of 3.5                                   | S 6/2 polypropylene<br>hollow-fiber membrane | /                    | 30 µL of pH 12.5 alkaline solution                                  | ~65 min               | 3.1–11.2    | 56–113       | <20     | [29]         |
| In-tip SPME<br>HPLC-PDA                           | 3  | 10 mL         | pH adjustment of 5–6                                   | 10 mg of activated<br>charcoal               | /                    | 500 µL of 1% ammonium in methanol solution                          | <30 min               | 380–1140    | 82.8–108.7   | <4.6    | [11]         |
| automated SPE<br>UPLC-MS/MS                       | 17 | 1 L           | Addition Na <sub>2</sub> EDTA, pH<br>adjustment of 3.0 | 500 mg of CNW<br>Poly-Sery HLB               | /                    | 8 mL of methanol : acetone (v/v, 1:1)                               | ~60 min               | 0.01–0.05   | 79–117       | <15     | Present work |

\* Number of SAs evaluated.

<sup>a</sup> porous polystyrene divinylbenzene.

<sup>b</sup> multi-templates surface molecularly imprinted polymer with pre-polymerization process.

<sup>c</sup> carboxylated magnetic graphene oxide

**Table S3. Concentrations (ng/L) of SAs in river water and seawater samples (ng/L).**

|                   |       | SG    | SP     | SD    | SMZ    | SM2   | SMM    | SDZ   | ΣSAs   |
|-------------------|-------|-------|--------|-------|--------|-------|--------|-------|--------|
| River water (n=6) | Mean  | 2.35  | 4.787  | 1.936 | 8.072  | 0.256 | 0.304  | ND    | 17.701 |
|                   | Min   | 0.975 | 0.14   | 0.035 | 2.368  | ND    | ND     | ND    | 8.157  |
|                   | Max   | 4.823 | 10.033 | 6.898 | 14.446 | 0.556 | 0.691  | ND    | 29.676 |
|                   | DF(%) | 100   | 100    | 100   | 100    | 83    | 67     | 0     | 100    |
| Seawater (n=12)   | Mean  | 0.506 | 0.723  | 1.361 | 9.833  | 0.22  | 4.213  | 0.128 | 16.984 |
|                   | Min   | ND    | 0.012  | 0.062 | 1.176  | 0.056 | 0.178  | ND    | 1.683  |
|                   | Max   | 1.733 | 1.825  | 2.176 | 27.605 | 0.47  | 19.867 | 0.423 | 36.955 |
|                   | DF(%) | 58    | 100    | 100   | 100    | 100   | 100    | 50    | 100    |

DF, detection frequency.

ND, not detected.

NC, not calculated, when the detection frequency <50%.
